# Supplementary material for: Human NORs, comprising rDNA arrays and functionally conserved distal elements, are located within dynamic chromosomal regions
Source: PubMed Central journal article supplement (PMC6942050; doi:10.1101/gad.331892.119), 2019-12-01
Supplement: supp_gad.331892.119_Supplemental_Data_.pdf [file supp_gad.331892.119_Supplemental_Data_.pdf]

**Human NORs, comprising rDNA arrays and functionally conserved distal elements, are located within dynamic chromosomal regions**

Marjolein van Sluis, Michael Ó Gailín, Joseph G. W. McCarter, Hazel Mangan, Alice Grob and Brian McStay.

**Supplementary Information**

Figures S1-S15

Tables S1-S4

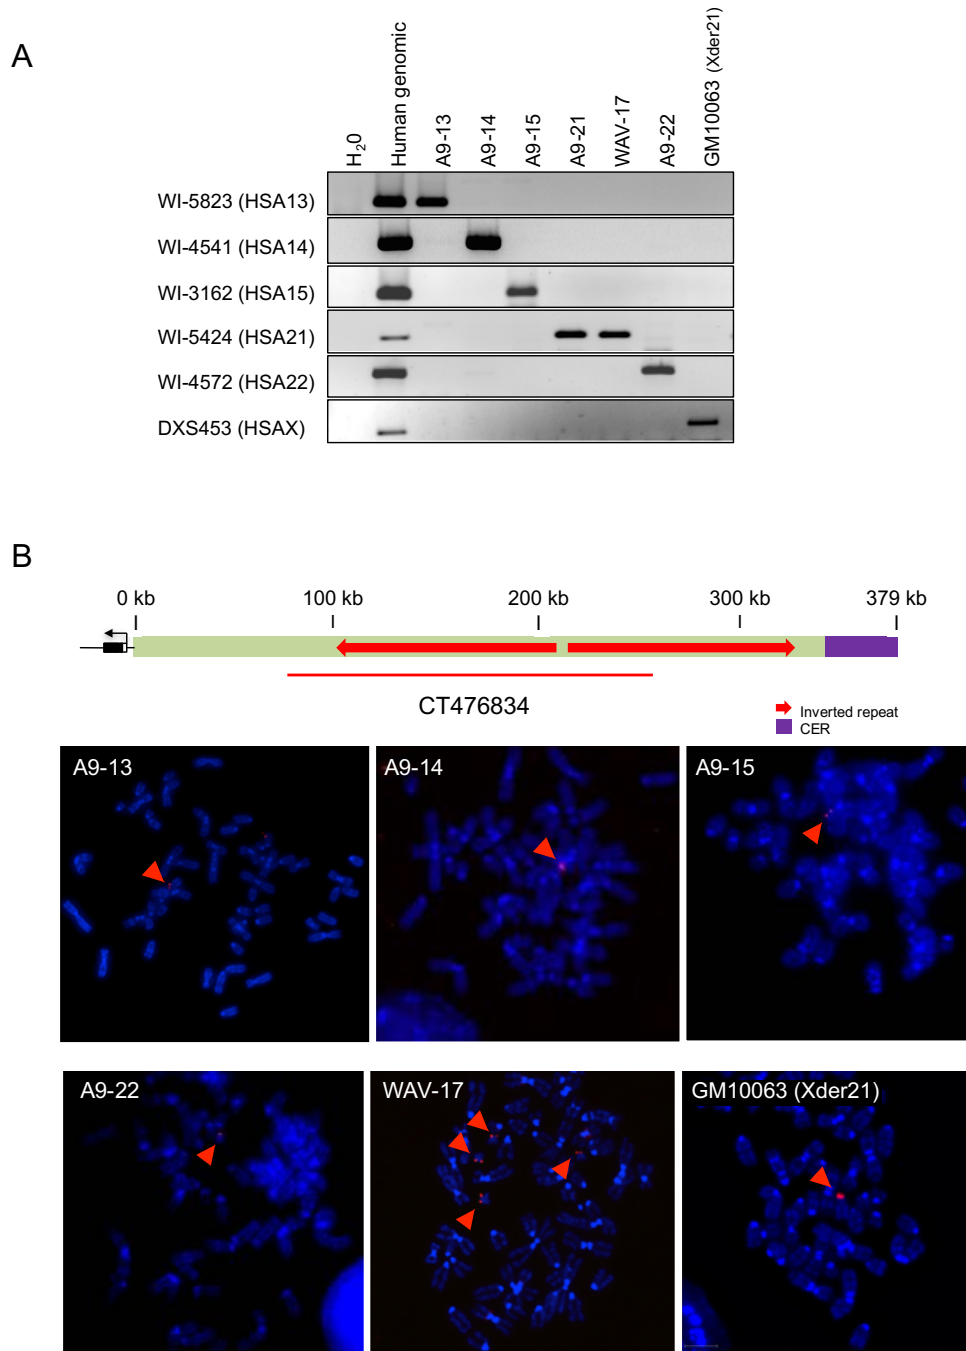

**Figure S1.** Verification of mono-chromosomal somatic cell hybrid panel. **(A)** PCR amplification of sequence tagged sites (STSs) from all five acrocentrics and HSAX was performed across the hybrid panel. Human genomic DNA and water served as a positive and negative controls respectively. **(B)** Metaphase spreads from the hybrid lines indicated were probed with DJ BAC clone CT476834 (red). Hybridisation signals are indicated by red arrowheads.

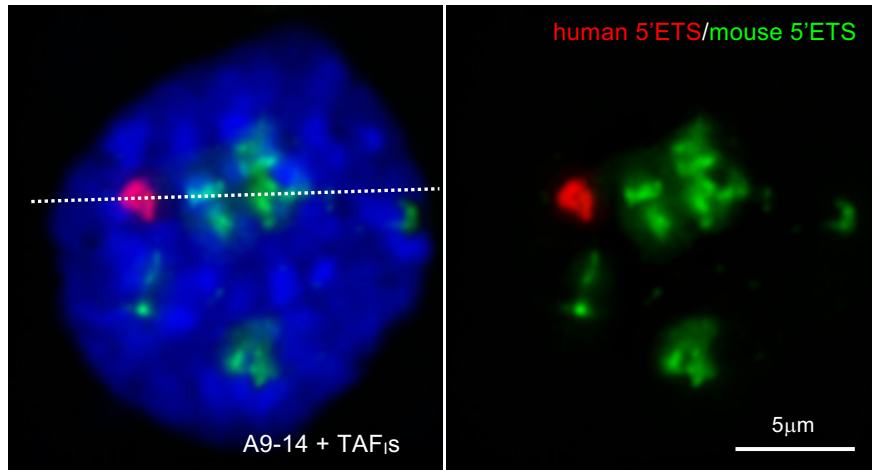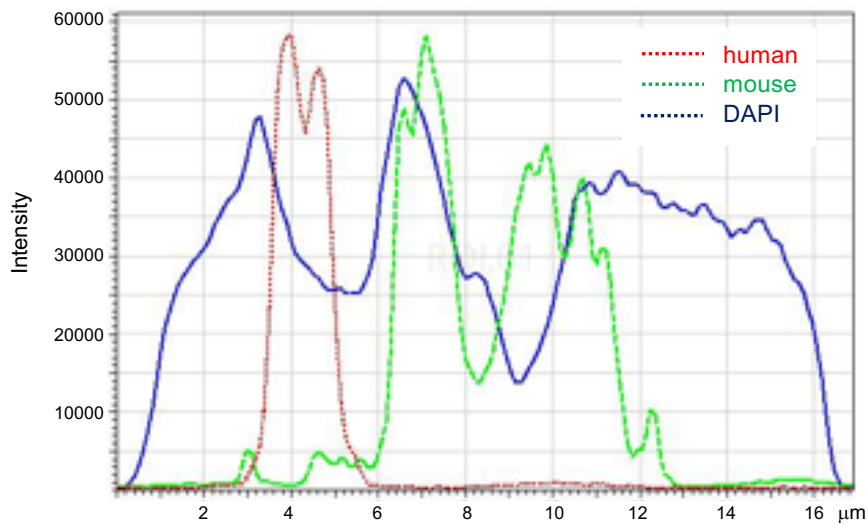

**Figure S2.** Quantitation of human NOR reactivation. A9-14 hybrid cells were transfected with plasmids encoding human TAF<sub>1</sub>s. Endogenous mouse pre-rRNA and pre-rRNA from the reactivated human NOR were detected using 5' ETS probes, green and red respectively. Green and red hybridization signals were captured using identical exposure settings. Fluorescence intensity profiles of DAPI, Red and Green channels across a nucleus, indicated by the dotted white line, are shown below.

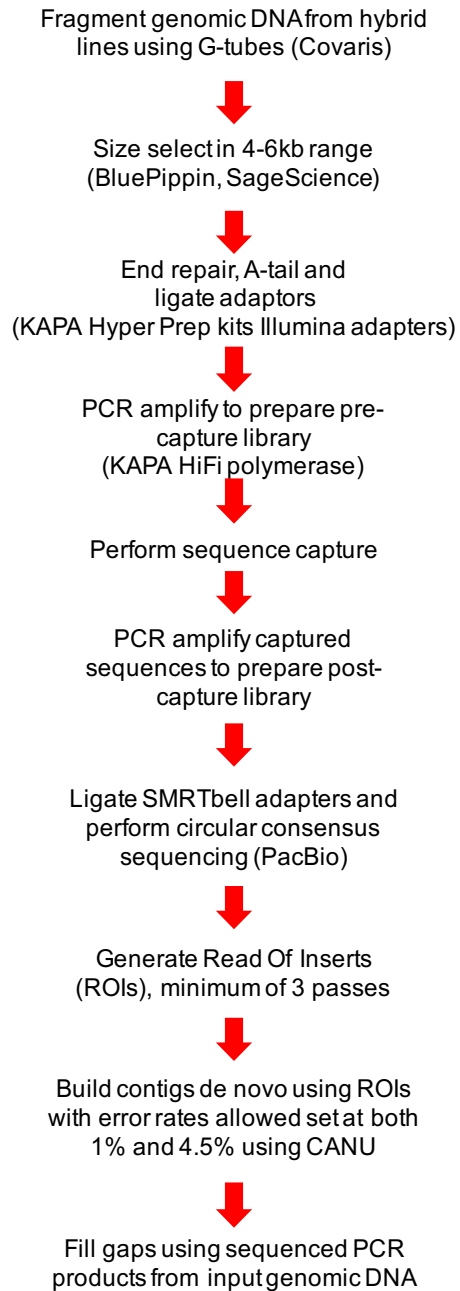

**Figure S3.** A diagram illustrating the DJ sequencing workflow.

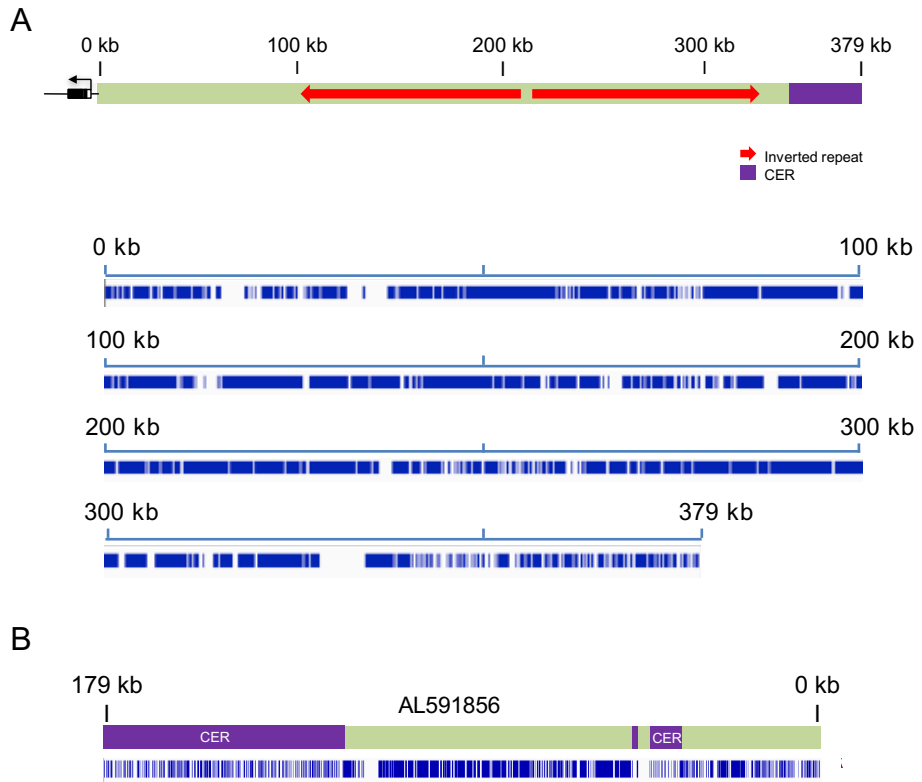

**Figure S4.** Capture oligo probes. Schematic representations of the original 379 kb DJ contig **(A)** and far distal BAC clone AL591856 **(B)** with the distribution of capture oligos (blue dashes) shown below each.

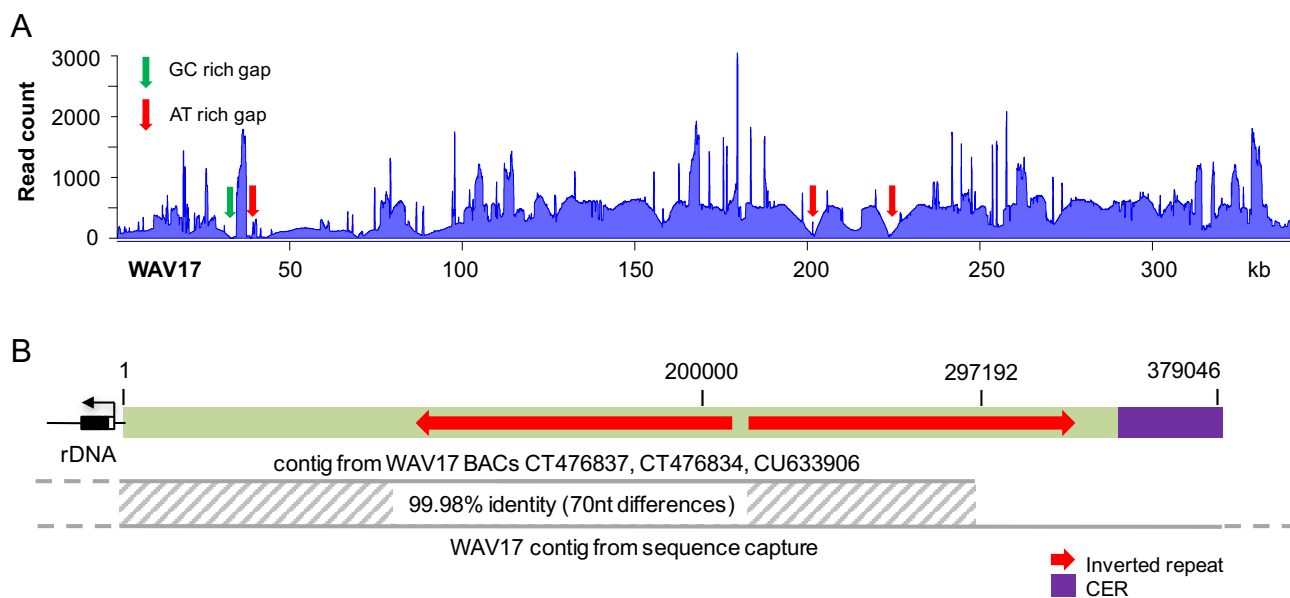

**Figure S5.** Validation of sequencing strategy. **(A)** Coverage of reads of inserts (ROIs) mapped onto the original DJ contig. The positions of AT and GC rich gaps (50-200 nucleotides) are indicated by red and green arrowheads respectively. **(B)** A comparison of the de novo assembled contig obtained from the WAV17 hybrid with the portion of the original DJ contig that was assembled using BAC clones from WAV17 library. The percentage identity and number of nucleotide differences are indicated.

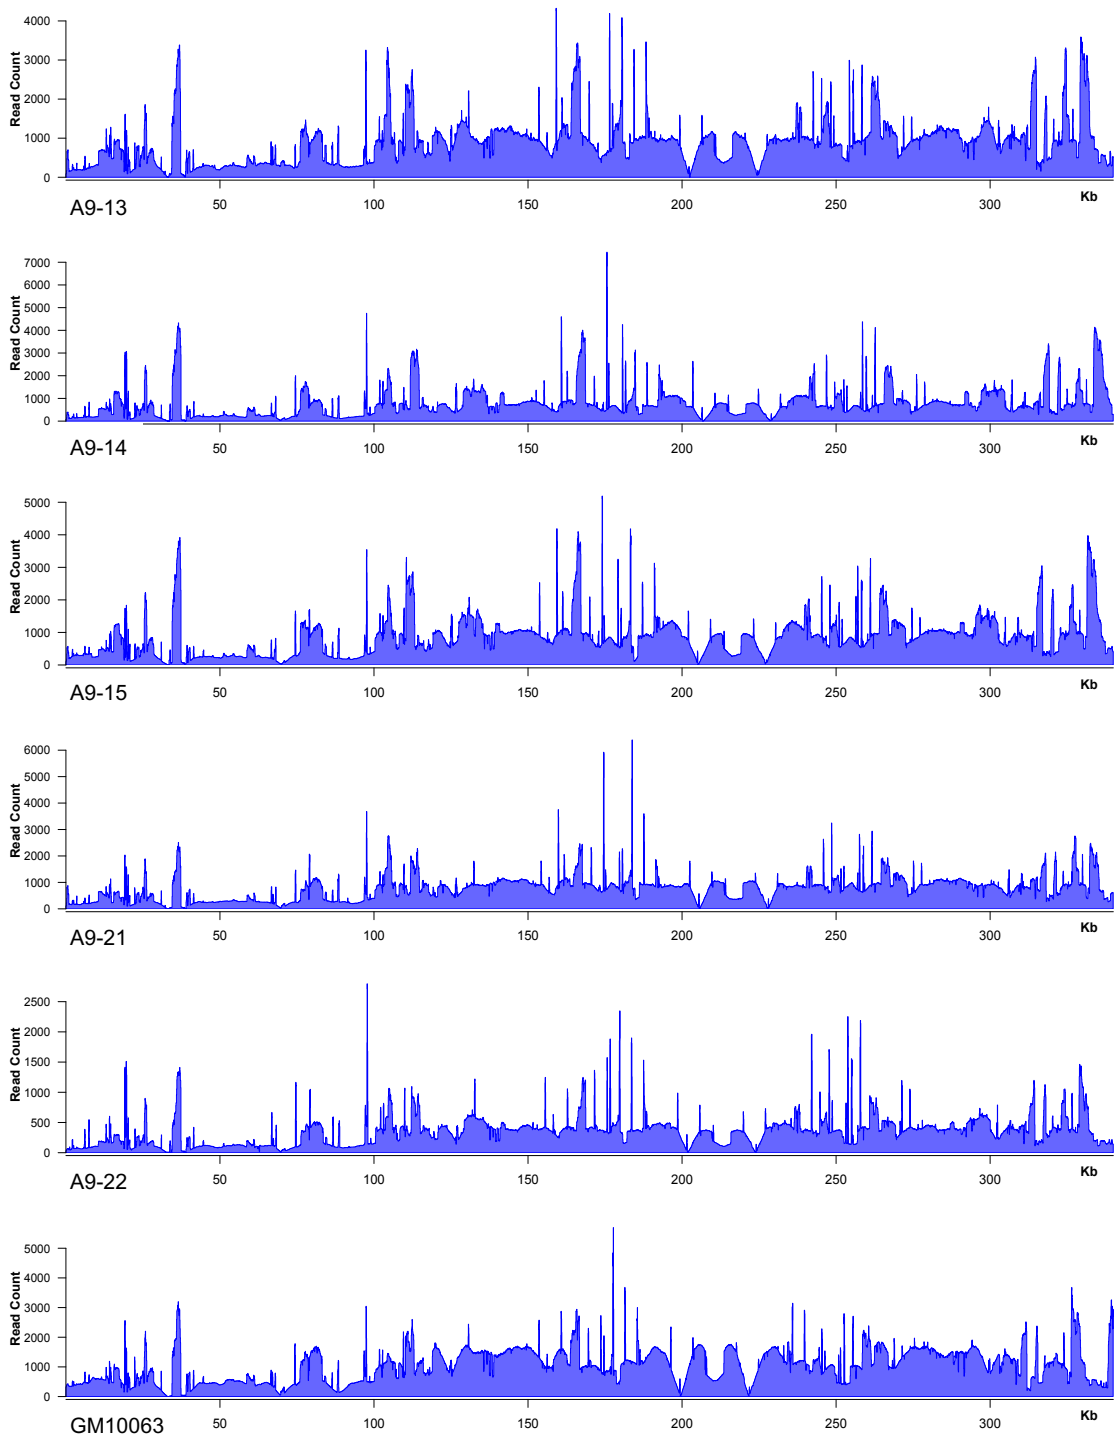

**Figure S6.** Coverage of ROIs from the remaining 6 hybrids mapped onto the original DJ contig.

**A**

A9-13 ctttttctttctcttttccccagaaacctacttttaattattttgttgcgtttcattttcattttcattttgccttcaagtcacagctcgcgaagcatggcaatacccttcttactaat  
A9-14 ctttttctttctcttttccccagaaacctacttttaattattttgttgcgtttcattttcattttcattttgccttcaagtcacagctcgcgaagcatggcaatacccttcttactaat  
A9-15 ctttttctttctcttttccccagaaacctacttttaattattttgttgcgtttcattttcattttcattttgccttcaagtcacagctcgcgaagcatggcaatacccttcttactaat  
A9-21 ctttttctttctcttttccccagaaacctacttttaattattttgttgcgtttcattttcattttcattttgccttcaagtcacagctcgcgaagcatggcaatacccttcttactaat  
A9-22 ctttttctttctcttttccccagaaacctacttttaattattttgttgcgtttcattttcattttcattttgccttcaagtcacagctcgcgaagcatggcaatacccttcttactaat  
WAV17 ctttttctttctcttttccccagaaacctacttttaattattttgttgcgtttcattttcattttcattttgccttcaagtcacagctcgcgaagcatggcaatacccttcttactaat  
GM10063 ctttttctttctcttttccccagaaacctacttttaattattttgttgcgtttcattttcattttcattttgccttcaagtcacagctcgcgaagcatggcaatacccttcttactaat  
\*\*\*\*\*

rDNA (~4kb upstream of pre-rRNA +1) DJ

**B**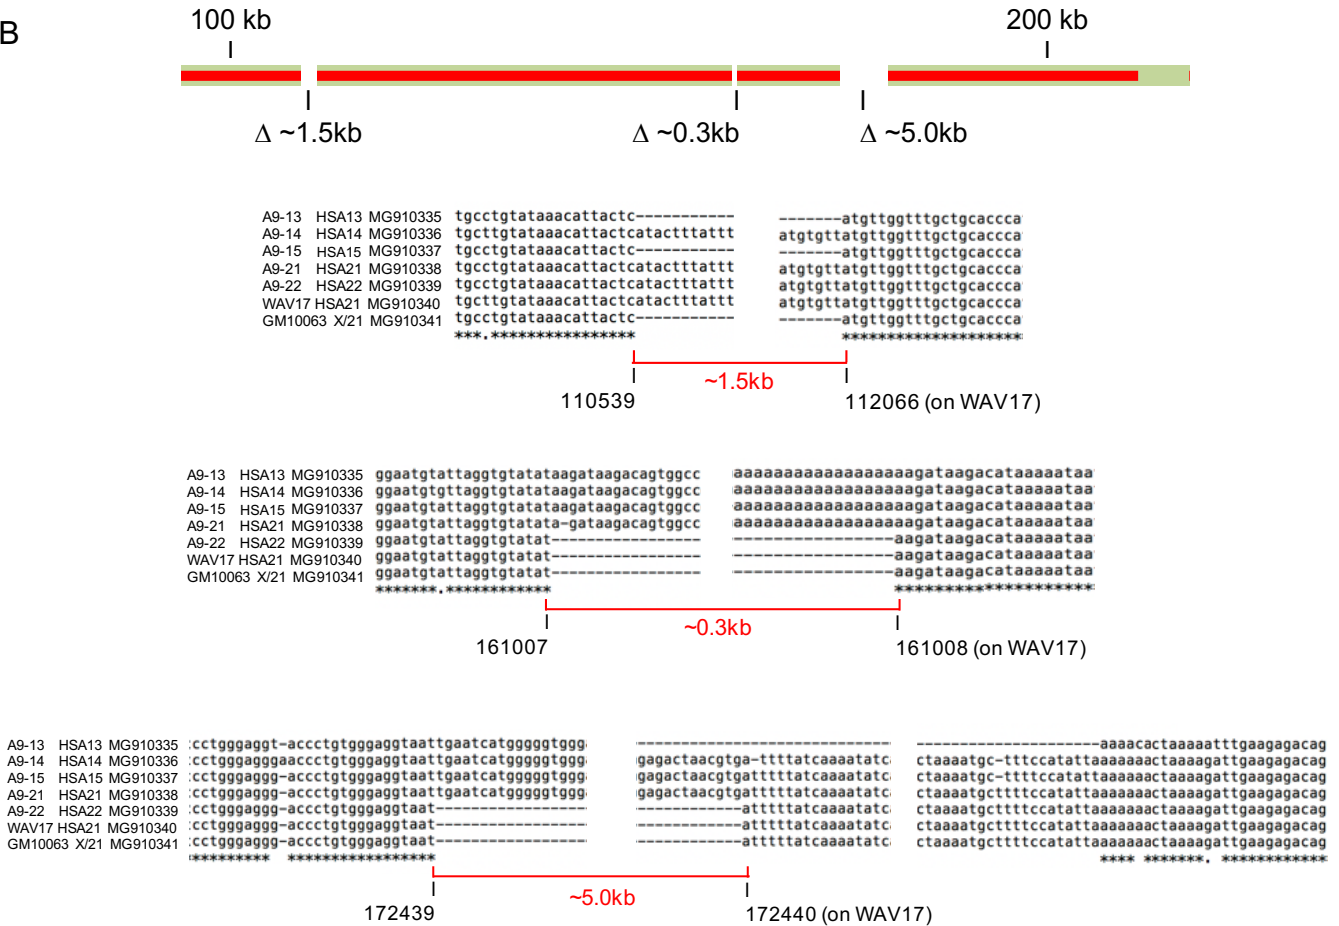

**Figure S7.** Sequence comparisons of DJ contigs. **(A)** Alignments of sequences at the junction between rDNA and the DJ. **(B)** A schematic representation of three indels observed on the left-arm inverted repeat. Sequence alignment across these indels are shown below. Note that the A9-13 DJ contig has a smaller indel that overlaps the 5kb indel.



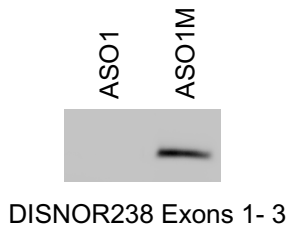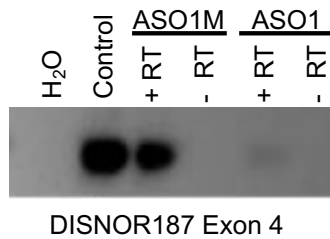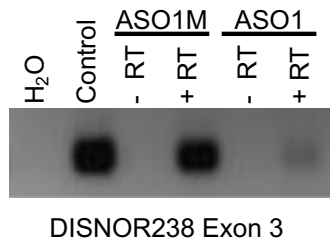

**Figure S8.** Depletion of DJ transcripts with antisense oligos. RT-PCR performed was performed on RNA isolated from hTert-RPE1 cells treated with either ASO1 or control ASO1M antisense oligos. In the upper panel disnor 238 is examined using exon1 and 3 forward and reverse primers respectively. In the middle panel, forward and reverse primers are from exon 4 of disnor 187. In the bottom panel, forward and reverse primers are from exon 3 of disnor 238. RNA from non-treated cells served as a positive control. Water and reverse transcriptase negative reactions provided negative controls.

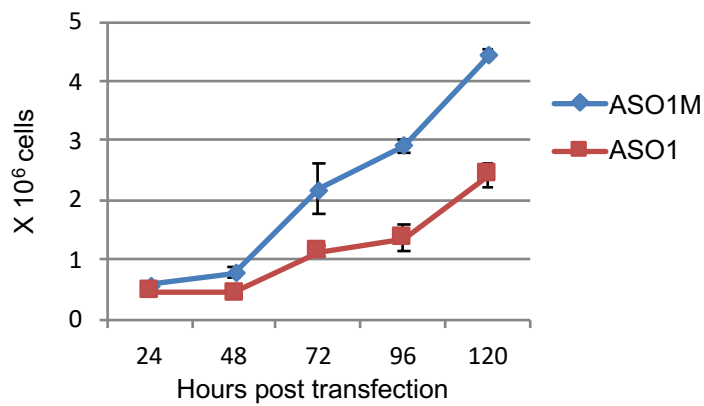

**Figure S9.** Growth curves after electroporation of hTert-RPE1 cells with ASO1 targeting disnors 187 and 238. ASO1M served as a negative control. Three independent replicates were performed.

A

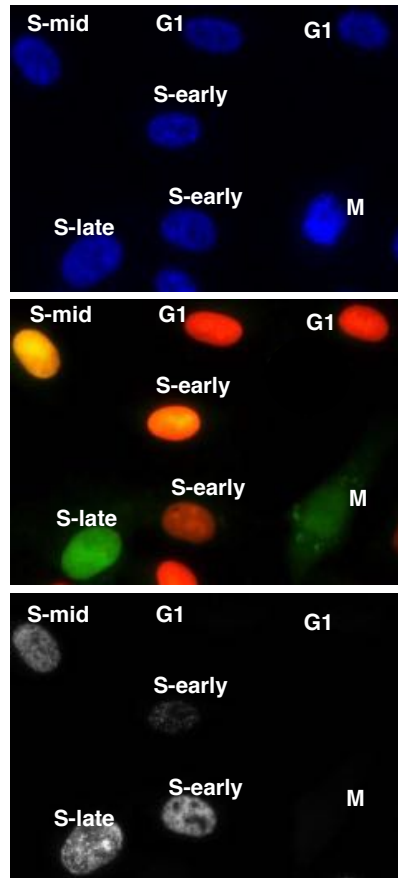

B

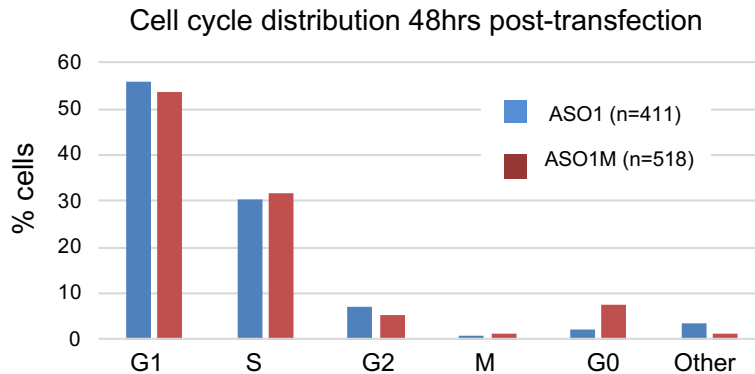

**Figure S10.** Cell cycle distribution post ASO transfection. **(A)** hTert-RPE1 cells, stably transfected with Fucci markers mCherry-Cdt1 and mAG-Geminin, were transfected with either ASO1 or ASO1M. 48 hours post transfection cells, were labelled with EdU for 30 mins followed click-chemistry. A field of ASO1M transfected cells is shown and various cell cycle stages are indicated. M-phase cells are recognized by DAPI staining. **(B)** The cell cycle distribution in ASO transfected cells determined by examination of Fucci markers and EdU incorporation. Note that G0 cells are identified by lack of Fucci markers. Cells in the columns labelled 'other' express both Fucci markers (yellow) but lack EdU incorporation, likely reflecting activation of an intra-S-phase checkpoint.

**A**

```

V8  ccgaaactcactttttaattatatttggcatttcattttcattttcattttgttttcaagtccagggtcgcaagcatggcgataccoccttctctactaagg
V10 cggaaactcactttttaattatatttggcatttcattttcattttcattttgttttcaagtccagggtcgcaagcatggcgataccoccttctctactaagg
V9  cggaaactcactttttaattatatttggcatttcattttcattttcattttgttttcaagtccagggtcgcaagcatggcgataccoccttctctactaagg
W2  cggaaactcactttttaattatatttggcatttcattttcattttcattttgttttcaagtccagggtcgcaagcatggcaataccoccttctctactaagg
W3  cggaaactcactttttaattatatttggcatttcattttcattttcattttgttttcaagtccagggtcgcaagcatggcgataccoccttctctactaagg
*****

```

rDNA (~4kb upstream of pre-rRNA +1) DJ

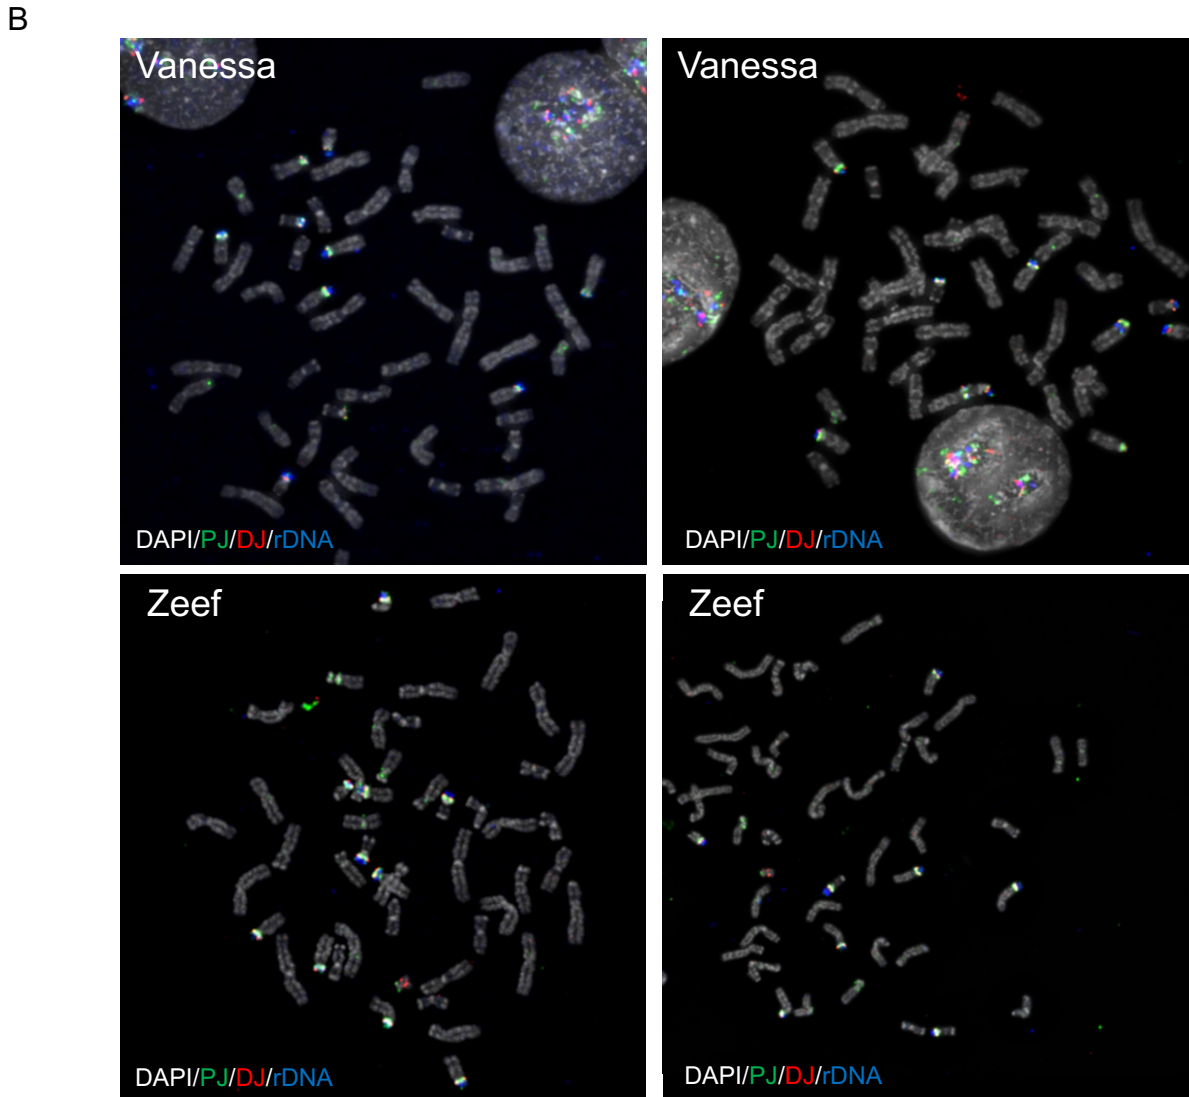

**Figure S11.** DJ-like sequences in chimpanzees. **(A)** Sequence alignments of rDNA-DJ like junctions. V8,9 and 10 are three independent PCR cloned products from chimpanzee Vanessa and W2 and 3 are from Walter. **(B)** Metaphase spreads from chimpanzees Vanessa (female) and Zeef (male) probed with 'DJ like' chimpanzee BAC clones (red), human PJ BAC clone bP-2154M18 (CR381535) (green) and rDNA (far red, pseudo-coloured here in blue). Chromosomes were DAPI stained (pseudo-coloured in grey).

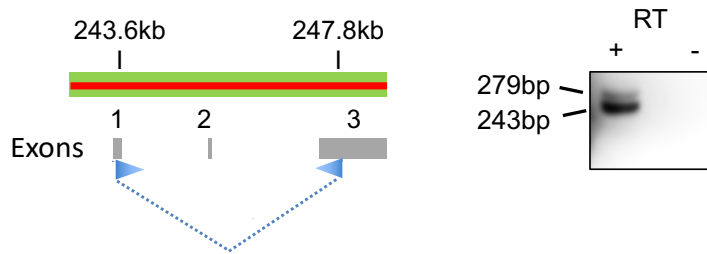

Exon 1 **ACAGCCCTTGTTCGCCCTGCG**ATCTGTAGGTCCTTGGGGACGCATAGTTAA  
 GGTGCCAGGACATCCTGGAAGCTGGGAAATGATTGTTGCAGTGTCCAGGAC  
 Exon 2 CAAGGTCAAATGAGTTATAGCCAAGTCTACAGTAAGATGTGGCAGTATTC  
 TGTTTTGAAGCCAGGACCATGATTGGGCGGGAGACCTTCCTTCACCACG  
 Exon 3 GTTTTGAGGCTATGGCTAAGT**GGTAAGCCTTGGGGAGATGCAG**

Sequence of 243bp PCR product

Exon 1 **ACAGCCCTTGTTCGCCCTGCG**ATCTGTAGGTCCTTGGGGACGCATAGTTAA  
 GGTGCCAGGACATCCTGGAAGCTGGGAAATGTTAGCATTTCATCATATCA  
 Exon 2 GTGTGAAGATTTCTTCCAGACCATGGCTGGAGAAGGAAAGAAGGTGTGTT  
 TTGCCTGATTTCAGGGACTATAGAGAGAACCAAGTTCTGCAGGCCGTTCAC  
 Exon 3 CTAAGTATCAGGGCGGAGAGACCTTCCTTCCCCACGGGTTTGAGACTATG  
 GCTAAGT**GGTAAGCCTTGGGGAGATGCAG**

Sequence of 279bp PCR product

**Figure S12.** Identification of DJ transcripts in chimpanzees. Based on alignments between human and chimpanzee DJs, the predicted locations of exons 1-3 of a DJ transcript from the right arm of the inverted repeat are indicated. The location of PCR primers used in RT-PCR are also indicated. Results from RT-PCR reactions using RNA from chimpanzee cells are shown on the right. The major band is a 243bp PCR product. The upper 279bp band is either a splicing variant or a similar transcript arising from a chimpanzee acrocentric with a variant DJ sequence. DNA sequences from cloned 243 and 279bp PCR products are shown below. PCR primer sequences are in bold and exon/exon boundaries are indicated by red arrowheads.

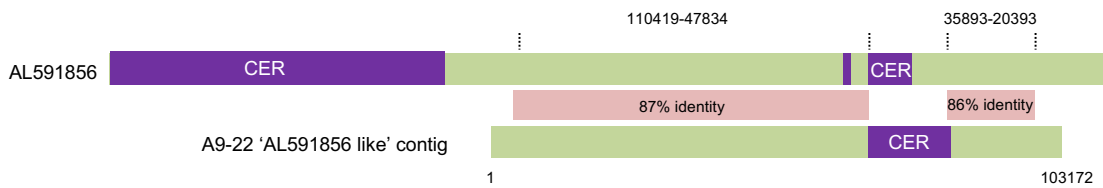

**Figure S13.** AL591856-like contig in A9-22. A second contig with homology to far distal BAC AL591856 was obtained. A schematic shows this contig positioned below AL591856 with the regions of homology and their percentage identity indicated.

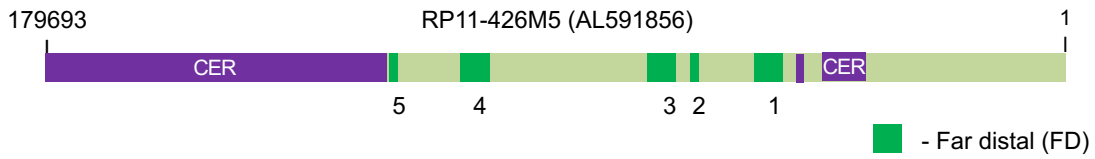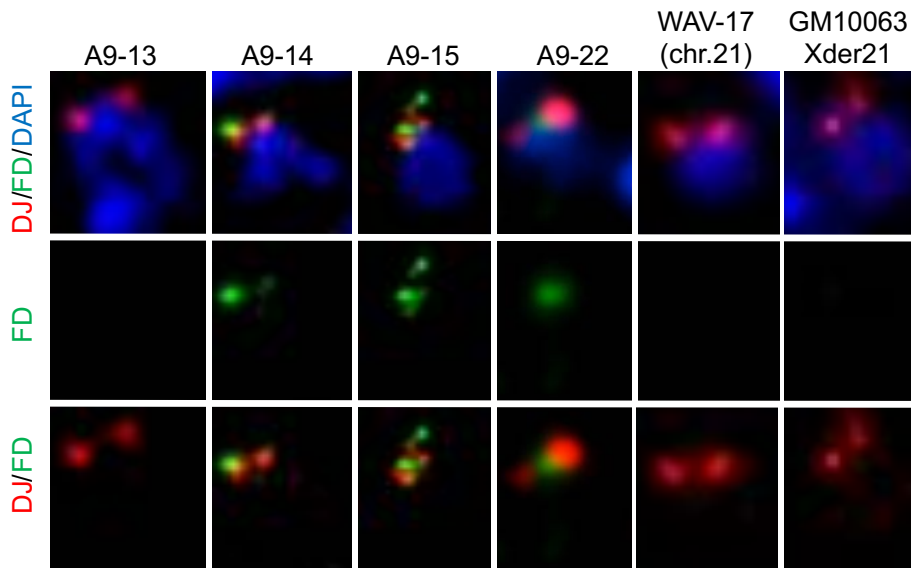

**Figure S14.** Confirmation of far distal sequences on human acrocentrics in the hybrid panel. Metaphase spreads prepared from mono-chromosomal hybrid lines were probed with DJ BAC CT476834 (red) and a far distal (FD) probe (green) prepared by labelling cloned PCR products (1-5) from non-repetitive regions of BAC clone AL591856. A schematic of the FD probe is shown above images of the human acrocentric chromosome present in each hybrid line. Note the absence of FD signal in A9-13, WAV17 and GM10063, and strong hybridisation signals in A9-14 and 15 as predicted by the sequence analysis (Fig. 6A). The FD hybridisation signal in A9-22 is presumably due to the second AL591856 related contig on HAS 22 in these cells (Fig. S9).

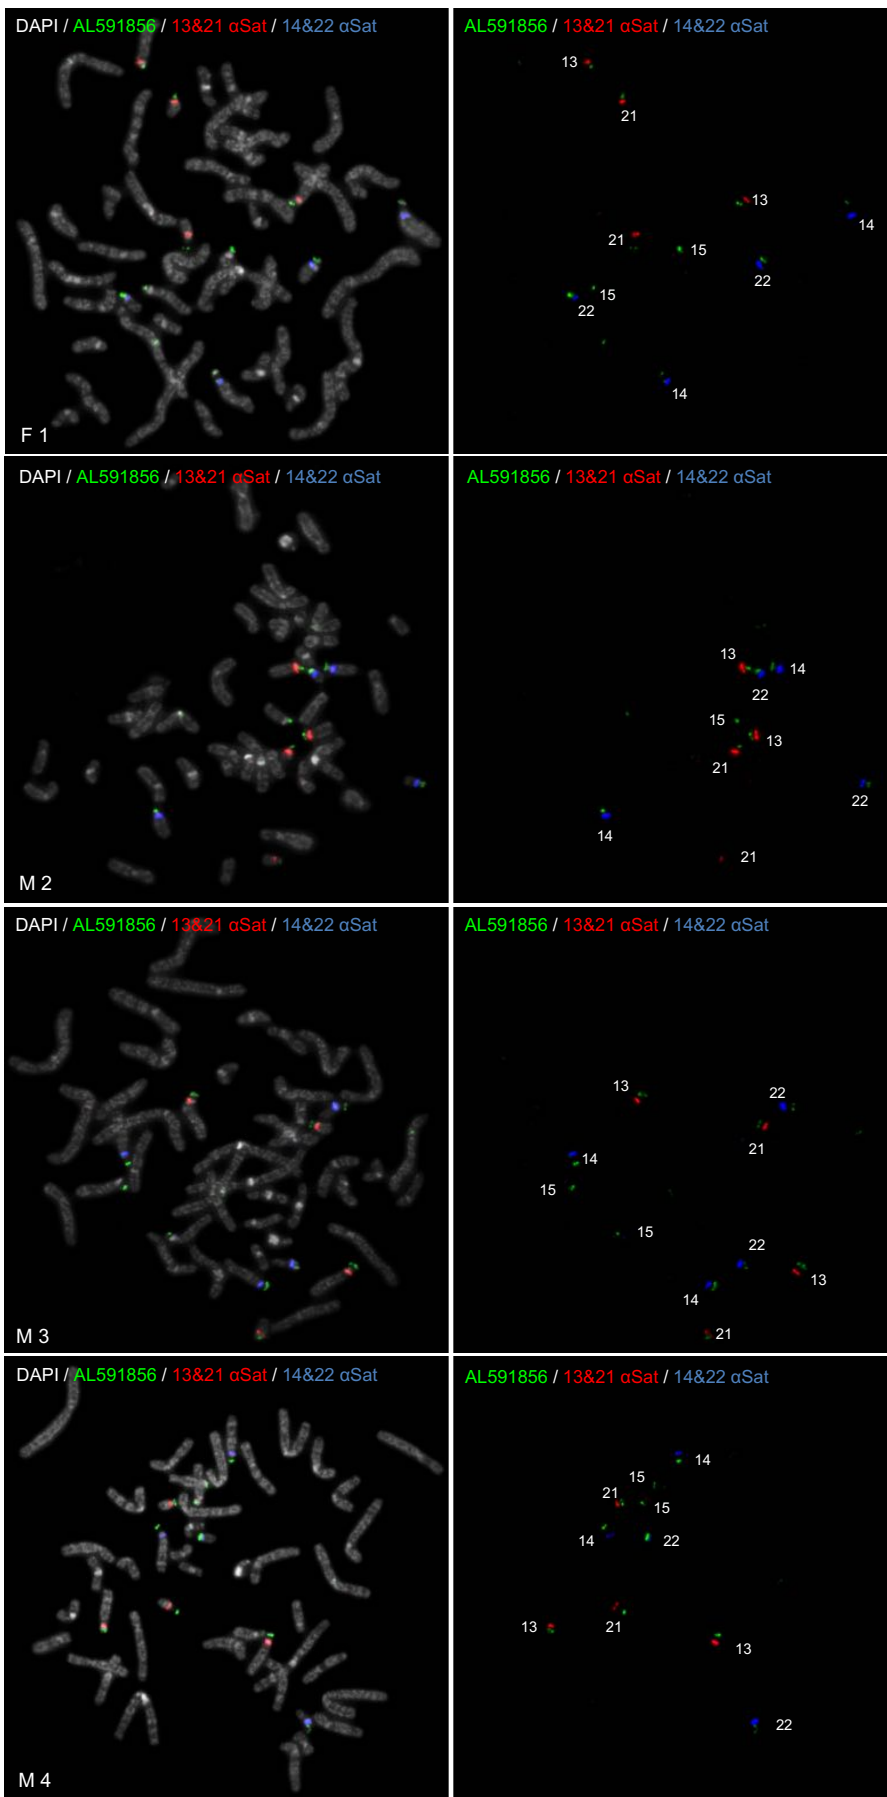

Fig. S15



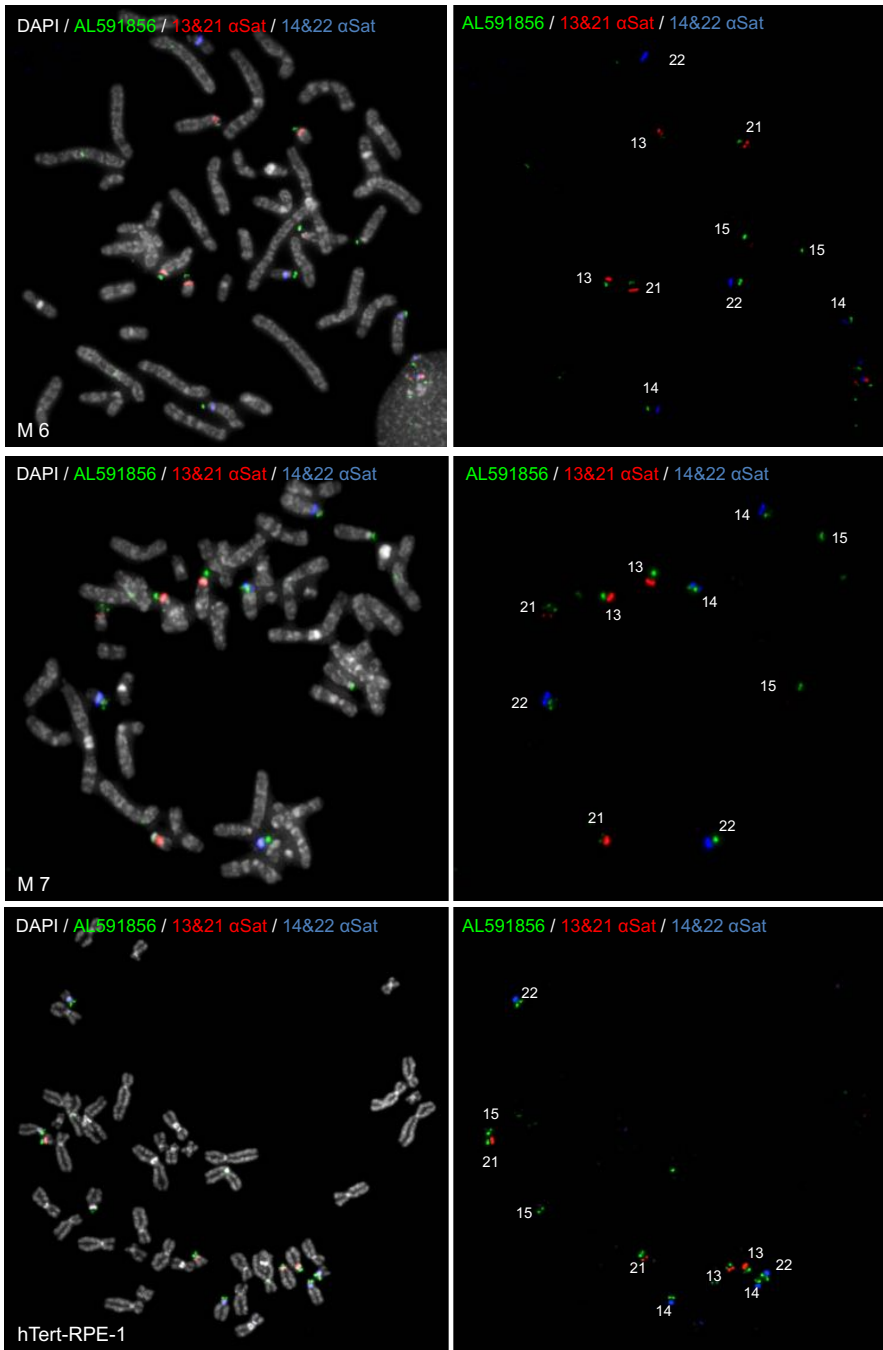

**Figure S15.** Variation in far distal sequences among human individuals. Normal metaphase spreads from six individual donors and from hTert-RPE1 cells were probed with BAC clone AL591856 (green) and alpha satellite probes recognising HSA13/ 21 (red) and HSA14/22 (far red, pseudo-coloured here in blue). Chromosomes were DAPI stained (pseudo-coloured in grey). Enlarged images of the 10 acrocentric p-arms from each spread are presented in Fig. 5D.

| Library | Number of ROIs | Mean read length (bp) | Mean number of passes | Read bases of inserts | Mean read quality of insert |
|---------|----------------|-----------------------|-----------------------|-----------------------|-----------------------------|
| A9-13   | 105772         | 3596                  | 9                     | 380456833             | 0.9827                      |
| A9-14   | 114179         | 3167                  | 8                     | 361611131             | 0.9812                      |
| A9-14   | 99946          | 3377                  | 8                     | 337546560             | 0.9798                      |
| A9-14   | 103063         | 2757                  | 11                    | 284169531             | 0.9813                      |
| A9-14   | 48361          | 3412                  | 8                     | 165042683             | 0.9794                      |
| WAV17   | 43778          | 3469                  | 8                     | 151890055             | 0.9768                      |
| GM10063 | 89992          | 3310                  | 10                    | 297924023             | 0.9794                      |

**Table S1** Summary of sequencing statistics

| Clone Name   | Library              | GenBank Accession | Obtained from           |
|--------------|----------------------|-------------------|-------------------------|
| CH507-146P16 | CHORI-507-HSA21      | CT476837          |                         |
| CH507-535F5  | CHORI-507-HSA21      | CT476834          | BACPAC Resources Center |
| CH507-145C22 | CHORI-507-HSA21      | CU633906          | BACPAC Resources Center |
| RP11-272E10  | RPCI-11 Human Male   | AC011841          | BACPAC Resources Center |
| RP11-426M5   | RPCI-11 Human Male   | AL591856          | BACPAC Resources Center |
| bP-2154M18   | CHORI-507-HSA21      | CR381535          |                         |
| CH251-114B1  | CHORI-251 Chimpanzee | AC194567          | BACPAC Resources Center |
| CH251-351B7  | CHORI-251 Chimpanzee | AC213064          | BACPAC Resources Center |
| CH251-577A14 | CHORI-251 Chimpanzee | AC195095          |                         |

**Table S2** BAC clones used in this study

| Name        | Sequence                                | Use/location                                         |
|-------------|-----------------------------------------|------------------------------------------------------|
| WL1F        | CACGCCTTCTCTTGCTCTCA                    | PCR across HERV-K in A9-22(HSA22) and WAV-17 (HSA21) |
| WL1r        | TGCCCATGGTTTCCAGAACA                    | as above                                             |
| GAP33F      | GTCACCCCGTCTCGGAAG                      | PCR across GC rich gap in read coverage at ~33kb     |
| GAP33R      | TCAACAGGATCCCAAGGCAG                    | as above                                             |
| GAP93F      | GCCGAGATGGAAGGATCACC                    | PCR across AT rich gap in read coverage at ~39kb     |
| GAP39R      | TTCAGGCGTTCATCCACCAG                    | as above                                             |
| GAP70F      | TGGAGAAGCGAGCTTCAGTG                    | PCR across AT rich gap in read coverage at ~70kb     |
| GAP70R      | CTTGGGTTGTCGATGGGACT                    | as above                                             |
| GAP202F     | CATGGCCAGCATGGCAAAAA                    | PCR across AT rich gap in read coverage at ~202kb    |
| GAP202R     | TCTGAGGCACTGAGAGGTGA                    | as above                                             |
| GAP223F     | TGTGAGACTTTGTTGGGGGT                    | PCR across AT rich gap in read coverage at ~223kb    |
| GAP223R     | ATGGCCAGCATGGCAAAAAAC                   | as above                                             |
| SeqCapPB1   | AATGATACGGCGACCACCGA*G*A                | Pre and post capture library amplification           |
| SeqCapPB2   | CAAGCAGAAGACGGCATACG*A*G                | as above * denotes phosphorothioate linkages         |
| disnor 238f | ACAGCCCCTGTTGCCCTGCG                    | RT-PCR, 238.5/exon1 (disnor 238)/forward             |
| disnor 238r | CTGCGTCTACCAAGGCTCACC                   | RT-PCR, 244.3/exon3 (disnor 238)/reverse             |
| 148F        | GCCTCATGCTGCATTCAAGG                    | RT-PCR, 148/exon4 (disnor 187)/forward               |
| 148R        | GTATAGAGCCGGTTTGCCT                     | RT-PCR, 148/exon4 (disnor 187)/reverse               |
| 248F        | GAGGAAAGGCCAGGAGGTC                     | RT-PCR, 248/exon3 (disnor 238)/forward               |
| 248R        | TTCACCTTCCAGACACGCTC                    | RT-PCR, 248/exon3 (disnor 238)/reverse               |
| AlphaSat1   | GAAGCTTA(A/T)(C/G)T(C/A)ACAGAGTT(G/T)AA | Generation of chromosome specific centromere probes  |
| AlphaSat2   | GCTGCAGATC(A/C)C(A/C)AAG(A/T/C)AGTTTC   | as above                                             |
| ALUN1nf     | TTCATCTAGGCATGGTGCTGT                   | PCR from AL591856 to construct FD probe 1            |
| ALUN1nr     | GTAGCTGGAGAGGTGTAGGT                    | as above                                             |
| ALUN2nf     | TCAGTTCCTTCAAGACTGCAT                   | PCR from AL591856 to construct FD probe 2            |
| ALUN2nr     | CCCAGAACCATCACCTGTTCT                   | as above                                             |
| ALUN3nf     | TGGGTGAGAGAGAAAGGTTTGG                  | PCR from AL591856 to construct FD probe 3            |
| ALUN3nr     | GCTGCAAAGAAAGCAAAGAGC                   | as above                                             |
| ALUN4nf     | TCTGTGACAGCAACACTTAGAAC                 | PCR from AL591856 to construct FD probe 4            |
| ALUN4nr     | TGTGACCAATGCAGTCAGTGT                   | as above                                             |
| ALUN5nf     | GTTTTGTATGGTAGCGGAACAAC                 | PCR from AL591856 to construct FD probe 5            |
| ALUN5nr     | ATCCCTGGAGCATCCATCCG                    | as above                                             |

**Table S3** Sequences of oligonucleotides used throughout this study

| Sequence         | Source of DNA                    | GenBank accession code | SRA accession code (post-capture ROIs) |
|------------------|----------------------------------|------------------------|----------------------------------------|
| HSA13 DJ         | Hybrid A9-13                     | MG910335               | SRR10403916                            |
| HSA14 DJ         | Hybrid A9-14                     | MG910336               | SRR10403915                            |
| HSA15 DJ         | Hybrid A9-15                     | MG910337               | SRR10403914                            |
| HSA21 DJ         | Hybrid A9-21                     | MG910338               | SRR10403913                            |
| HSA22 DJ         | Hybrid A9-22                     | MG910339               | SRR10403912                            |
| HSA21 DJ         | Hybrid WAV17                     | MG910340               | SRR10403910                            |
| Xder21 DJ        | Hybrid GM10063                   | MG910341               | SRR10403911                            |
| HSA14 far-distal | Hybrid A9-14                     | MN651987               | SRR10403915                            |
| HSA15 far-distal | Hybrid A9-15                     | MN651988               | SRR10403914                            |
| DJ Like (seq1)   | <i>Pan troglodytes</i> (Vanessa) | MN646268               | N/A                                    |
| DJ Like (seq2)   | <i>Pan troglodytes</i> (Vanessa) | MN646269               | N/A                                    |
| DJ Like (seq3)   | <i>Pan troglodytes</i> (Vanessa) | MN646270               | N/A                                    |
| DJ Like (seq4)   | <i>Pan troglodytes</i> (Walter)  | MN646271               | N/A                                    |
| DJ Like (seq5)   | <i>Pan troglodytes</i> (Walter)  | MN646272               | N/A                                    |

**Table S4** Genbank accession codes and links to Sequence Read Archive (SRA)
